# Supplementary material for: Identifying key genes related to inflammasome in severe COVID-19 patients based on a joint model with random forest and artificial neural network
Source: Front Cell Infect Microbiol. 2023 Apr 11;13:1139998. doi: 10.3389/fcimb.2023.1139998 (PMC10126306; doi:10.3389/fcimb.2023.1139998)
Supplement: Supplementary file 3 [file Table_2.xls]

## Sheet: Supplementary Table S2
Supplementary Table S2. The kmeans cluster of PPI network of 192 DEGs
#clustering method	cluster number	cluster color	gene count	protein name	protein identifier	protein description
kmeans	1	Red	50	ADORA2A	9606.ENSP00000336630	Adenosine A2a receptor; Receptor for adenosine. The activity of this receptor is mediated by G proteins which activate adenylyl cyclase; Belongs to the G-protein coupled receptor 1 family
kmeans	1	Red	50	AMICA1	9606.ENSP00000348635	Junctional adhesion molecule-like; Transmembrane protein of the plasma membrane of leukocytes that control their migration and activation through interaction with CXADR, a plasma membrane receptor found on adjacent epithelial and endothelial cells. The interaction between both receptors mediates the activation of gamma-delta T-cells, a subpopulation of T-cells residing in epithelia and involved i…
kmeans	1	Red	50	AXL	9606.ENSP00000301178	Tyrosine-protein kinase receptor UFO; Receptor tyrosine kinase that transduces signals from the extracellular matrix into the cytoplasm by binding growth factor GAS6 and which is thus regulating many physiological processes including cell survival, cell proliferation, migration and differentiation. Ligand binding at the cell surface induces dimerization and autophosphorylation of AXL. Following a…
kmeans	1	Red	50	CBLB	9606.ENSP00000264122	E3 ubiquitin-protein ligase CBL-B; E3 ubiquitin-protein ligase which accepts ubiquitin from specific E2 ubiquitin-conjugating enzymes, and transfers it to substrates, generally promoting their degradation by the proteasome. Negatively regulates TCR (T-cell receptor), BCR (B- cell receptor) and FCER1 (high affinity immunoglobulin epsilon receptor) signal transduction pathways. In naive T-cells, in…
kmeans	1	Red	50	CD47	9606.ENSP00000355361	Leukocyte surface antigen CD47; Has a role in both cell adhesion by acting as an adhesion receptor for THBS1 on platelets, and in the modulation of integrins. Plays an important role in memory formation and synaptic plasticity in the hippocampus (By similarity). Receptor for SIRPA, binding to which prevents maturation of immature dendritic cells and inhibits cytokine production by mature dendriti…
kmeans	1	Red	50	CD63	9606.ENSP00000447730	CD63 antigen; Functions as cell surface receptor for TIMP1 and plays a role in the activation of cellular signaling cascades. Plays a role in the activation of ITGB1 and integrin signaling, leading to the activation of AKT, FAK/PTK2 and MAP kinases. Promotes cell survival, reorganization of the actin cytoskeleton, cell adhesion, spreading and migration, via its role in the activation of AKT and F…
kmeans	1	Red	50	CD79A	9606.ENSP00000221972	B-cell antigen receptor complex-associated protein alpha chain; Required in cooperation with CD79B for initiation of the signal transduction cascade activated by binding of antigen to the B-cell antigen receptor complex (BCR) which leads to internalization of the complex, trafficking to late endosomes and antigen presentation. Also required for BCR surface expression and for efficient differentia…
kmeans	1	Red	50	CD97	9606.ENSP00000242786	CD97 antigen; Receptor potentially involved in both adhesion and signaling processes early after leukocyte activation. Plays an essential role in leukocyte migration (By similarity); Belongs to the G-protein coupled receptor 2 family. LN-TM7 subfamily
kmeans	1	Red	50	CEACAM1	9606.ENSP00000161559	Carcinoembryonic antigen-related cell adhesion molecule 1; Isoform 1: Cell adhesion protein that mediates homophilic cell adhesion in a calcium-independent manner (By similarity). Plays a role as coinhibitory receptor in immune response, insulin action and functions also as an activator during angiogenesis. Its coinhibitory receptor function is phosphorylation- and PTPN6 -dependent, which in turn…
kmeans	1	Red	50	CEACAM8	9606.ENSP00000244336	Carcinoembryonic antigen-related cell adhesion molecule 8; Carcinoembryonic antigen related cell adhesion molecule family; Belongs to the immunoglobulin superfamily. CEA family
kmeans	1	Red	50	CTLA4	9606.ENSP00000303939	Cytotoxic T-lymphocyte protein 4; Inhibitory receptor acting as a major negative regulator of T-cell responses. The affinity of CTLA4 for its natural B7 family ligands, CD80 and CD86, is considerably stronger than the affinity of their cognate stimulatory coreceptor CD28
kmeans	1	Red	50	EGR2	9606.ENSP00000242480	E3 SUMO-protein ligase EGR2; Sequence-specific DNA-binding transcription factor. Binds to two specific DNA sites located in the promoter region of HOXA4; Belongs to the EGR C2H2-type zinc-finger protein family
kmeans	1	Red	50	EGR3	9606.ENSP00000318057	Early growth response protein 3; Probable transcription factor involved in muscle spindle development; Belongs to the EGR C2H2-type zinc-finger protein family
kmeans	1	Red	50	FOXO1	9606.ENSP00000368880	Forkhead box protein O1; Transcription factor that is the main target of insulin signaling and regulates metabolic homeostasis in response to oxidative stress. Binds to the insulin response element (IRE) with consensus sequence 5'-TT[G/A]TTTTG-3' and the related Daf-16 family binding element (DBE) with consensus sequence 5'- TT[G/A]TTTAC-3'. Activity suppressed by insulin. Main regulator of redox…
kmeans	1	Red	50	FUT4	9606.ENSP00000351602	Alpha-(1,3)-fucosyltransferase 4; May catalyze alpha-1,3 glycosidic linkages involved in the expression of Lewis X/SSEA-1 and VIM-2 antigens; CD molecules
kmeans	1	Red	50	ID3	9606.ENSP00000363689	DNA-binding protein inhibitor ID-3; Transcriptional regulator (lacking a basic DNA binding domain) which negatively regulates the basic helix-loop-helix (bHLH) transcription factors by forming heterodimers and inhibiting their DNA binding and transcriptional activity. Implicated in regulating a variety of cellular processes, including cellular growth, senescence, differentiation, apoptosis, angio…
kmeans	1	Red	50	IGF1R	9606.ENSP00000268035	Insulin-like growth factor 1 receptor; Receptor tyrosine kinase which mediates actions of insulin-like growth factor 1 (IGF1). Binds IGF1 with high affinity and IGF2 and insulin (INS) with a lower affinity. The activated IGF1R is involved in cell growth and survival control. IGF1R is crucial for tumor transformation and survival of malignant cell. Ligand binding activates the receptor kinase, lea…
kmeans	1	Red	50	IGJ	9606.ENSP00000254801	Joining chain of multimeric iga and igm; Immunoglobulin J chain; Serves to link two monomer units of either IgM or IgA. In the case of IgM, the J chain-joined dimer is a nucleating unit for the IgM pentamer, and in the case of IgA it induces larger polymers. It also help to bind these immunoglobulins to secretory component
kmeans	1	Red	50	IKZF2	9606.ENSP00000412869	Zinc finger protein Helios; Associates with Ikaros at centromeric heterochromatin; Zinc fingers C2H2-type
kmeans	1	Red	50	IRS1	9606.ENSP00000304895	Insulin receptor substrate 1; May mediate the control of various cellular processes by insulin. When phosphorylated by the insulin receptor binds specifically to various cellular proteins containing SH2 domains such as phosphatidylinositol 3-kinase p85 subunit or GRB2. Activates phosphatidylinositol 3-kinase when bound to the regulatory p85 subunit (By similarity)
kmeans	1	Red	50	ITGA1	9606.ENSP00000282588	Integrin alpha-1; Integrin alpha-1/beta-1 is a receptor for laminin and collagen. It recognizes the proline-hydroxylated sequence G-F-P-G- E-R in collagen. Involved in anchorage-dependent, negative regulation of EGF-stimulated cell growth; CD molecules
kmeans	1	Red	50	ITGAE	9606.ENSP00000263087	Integrin subunit alpha e; Integrin alpha-E; Integrin alpha-E/beta-7 is a receptor for E-cadherin. It mediates adhesion of intra-epithelial T-lymphocytes to epithelial cell monolayers
kmeans	1	Red	50	ITGAL	9606.ENSP00000349252	Integrin subunit alpha l; Integrin alpha-L; Integrin alpha-L/beta-2 is a receptor for ICAM1, ICAM2, ICAM3 and ICAM4. Integrin alpha-L/beta-2 is also a receptor for F11R. Involved in a variety of immune phenomena including leukocyte-endothelial cell interaction, cytotoxic T-cell mediated killing, and antibody dependent killing by granulocytes and monocytes. Contributes to natural killer cell cytot…
kmeans	1	Red	50	ITGAM	9606.ENSP00000441691	Integrin alpha-M; Integrin ITGAM/ITGB2 is implicated in various adhesive interactions of monocytes, macrophages and granulocytes as well as in mediating the uptake of complement-coated particles. It is identical with CR-3, the receptor for the iC3b fragment of the third complement component. It probably recognizes the R-G-D peptide in C3b. Integrin ITGAM/ITGB2 is also a receptor for fibrinogen, f…
kmeans	1	Red	50	ITGB1	9606.ENSP00000379350	Integrin beta-1; Integrins alpha-1/beta-1, alpha-2/beta-1, alpha-10/beta- 1 and alpha-11/beta-1 are receptors for collagen. Integrins alpha- 1/beta-1 and alpha-2/beta-2 recognize the proline-hydroxylated sequence G-F-P-G-E-R in collagen. Integrins alpha-2/beta-1, alpha- 3/beta-1, alpha-4/beta-1, alpha-5/beta-1, alpha-8/beta-1, alpha- 10/beta-1, alpha-11/beta-1 and alpha-V/beta-1 are receptors for…
kmeans	1	Red	50	ITGB7	9606.ENSP00000267082	Integrin subunit beta 7; Integrin beta-7; Integrin alpha-4/beta-7 (Peyer patches-specific homing receptor LPAM-1) is an adhesion molecule that mediates lymphocyte migration and homing to gut-associated lymphoid tissue (GALT). Integrin alpha-4/beta-7 interacts with the cell surface adhesion molecules MADCAM1 which is normally expressed by the vascular endothelium of the gastrointestinal tract. Int…
kmeans	1	Red	50	KLF2	9606.ENSP00000248071	Krueppel-like factor 2; Transcription factor that binds to the CACCC box in the promoter of target genes such as HBB/beta globin or NOV and activates their transcription; Kruppel like factors
kmeans	1	Red	50	KREMEN1	9606.ENSP00000331242	Kremen protein 1; Receptor for Dickkopf proteins. Cooperates with DKK1/2 to inhibit Wnt/beta-catenin signaling by promoting the endocytosis of Wnt receptors LRP5 and LRP6. In the absence of DKK1, potentiates Wnt-beta-catenin signaling by maintaining LRP5 or LRP6 at the cell membrane. Can trigger apoptosis in a Wnt-independent manner and this apoptotic activity is inhibited upon binding of the lig…
kmeans	1	Red	50	LRP1	9606.ENSP00000243077	Prolow-density lipoprotein receptor-related protein 1; Endocytic receptor involved in endocytosis and in phagocytosis of apoptotic cells. Required for early embryonic development. Involved in cellular lipid homeostasis. Involved in the plasma clearance of chylomicron remnants and activated LRPAP1 (alpha 2-macroglobulin), as well as the local metabolism of complexes between plasminogen activators …
kmeans	1	Red	50	LST1	9606.ENSP00000365261	Leukocyte-specific transcript 1 protein; Possible role in modulating immune responses. Induces morphological changes including production of filopodia and microspikes when overexpressed in a variety of cell types and may be involved in dendritic cell maturation. Isoform 1 and isoform 2 have an inhibitory effect on lymphocyte proliferation
kmeans	1	Red	50	LYZ	9606.ENSP00000261267	Lysozyme C; Lysozymes have primarily a bacteriolytic function; those in tissues and body fluids are associated with the monocyte- macrophage system and enhance the activity of immunoagents; Lysozymes, c-type
kmeans	1	Red	50	MMP9	9606.ENSP00000361405	Matrix metalloproteinase-9; May play an essential role in local proteolysis of the extracellular matrix and in leukocyte migration. Could play a role in bone osteoclastic resorption. Cleaves KiSS1 at a Gly-|-Leu bond. Cleaves type IV and type V collagen into large C-terminal three quarter fragments and shorter N-terminal one quarter fragments. Degrades fibronectin but not laminin or Pz-peptide; M…
kmeans	1	Red	50	MPO	9606.ENSP00000225275	Myeloperoxidase; Part of the host defense system of polymorphonuclear leukocytes. It is responsible for microbicidal activity against a wide range of organisms. In the stimulated PMN, MPO catalyzes the production of hypohalous acids, primarily hypochlorous acid in physiologic situations, and other toxic intermediates that greatly enhance PMN microbicidal activity; Belongs to the peroxidase family…
kmeans	1	Red	50	MS4A1	9606.ENSP00000433277	Membrane spanning 4-domains a1; B-lymphocyte antigen CD20; This protein may be involved in the regulation of B-cell activation and proliferation; Belongs to the MS4A family
kmeans	1	Red	50	NRP1	9606.ENSP00000265371	Neuropilin-1; The membrane-bound isoform 1 is a receptor involved in the development of the cardiovascular system, in angiogenesis, in the formation of certain neuronal circuits and in organogenesis outside the nervous system. It mediates the chemorepulsant activity of semaphorins. It binds to semaphorin 3A, The PLGF-2 isoform of PGF, The VEGF165 isoform of VEGFA and VEGFB. Coexpression with KDR …
kmeans	1	Red	50	PECAM1	9606.ENSP00000457421	Platelet endothelial cell adhesion molecule; Cell adhesion molecule which is required for leukocyte transendothelial migration (TEM) under most inflammatory conditions. Tyr-690 plays a critical role in TEM and is required for efficient trafficking of PECAM1 to and from the lateral border recycling compartment (LBRC) and is also essential for the LBRC membrane to be targeted around migrating leuko…
kmeans	1	Red	50	PIK3CD	9606.ENSP00000366563	Phosphatidylinositol 4,5-bisphosphate 3-kinase catalytic subunit delta isoform; Phosphoinositide-3-kinase (PI3K) that phosphorylates PftdIns(4,5)P2 (Phosphatidylinositol 4,5-bisphosphate) to generate phosphatidylinositol 3,4,5-trisphosphate (PIP3). PIP3 plays a key role by recruiting PH domain-containing proteins to the membrane, including AKT1 and PDPK1, activating signaling cascades involved in…
kmeans	1	Red	50	PTEN	9606.ENSP00000361021	Phosphatase and tensin homolog; Tumor suppressor. Acts as a dual-specificity protein phosphatase, dephosphorylating tyrosine-, serine- and threonine- phosphorylated proteins. Also acts as a lipid phosphatase, removing the phosphate in the D3 position of the inositol ring from phosphatidylinositol 3,4,5-trisphosphate, phosphatidylinositol 3,4-diphosphate, phosphatidylinositol 3- phosphate and inos…
kmeans	1	Red	50	PTGS2	9606.ENSP00000356438	Prostaglandin G/H synthase 2; Converts arachidonate to prostaglandin H2 (PGH2), a committed step in prostanoid synthesis. Constitutively expressed in some tissues in physiological conditions, such as the endothelium, kidney and brain, and in pathological conditions, such as in cancer. PTGS2 is responsible for production of inflammatory prostaglandins. Up-regulation of PTGS2 is also associated wit…
kmeans	1	Red	50	RPS6	9606.ENSP00000369757	40S ribosomal protein S6; May play an important role in controlling cell growth and proliferation through the selective translation of particular classes of mRNA; S ribosomal proteins
kmeans	1	Red	50	S100A8	9606.ENSP00000357722	Protein S100-A8; S100A8 is a calcium- and zinc-binding protein which plays a prominent role in the regulation of inflammatory processes and immune response. It can induce neutrophil chemotaxis and adhesion. Predominantly found as calprotectin (S100A8/A9) which has a wide plethora of intra- and extracellular functions. The intracellular functions include: facilitating leukocyte arachidonic acid tr…
kmeans	1	Red	50	SIT1	9606.ENSP00000259608	Signaling threshold-regulating transmembrane adapter 1; Negatively regulates TCR (T-cell antigen receptor)- mediated signaling in T-cells. Involved in positive selection of T-cells
kmeans	1	Red	50	SKAP2	9606.ENSP00000005587	Src kinase-associated phosphoprotein 2; May be involved in B-cell and macrophage adhesion processes. In B-cells, may act by coupling the B-cell receptor (BCR) to integrin activation. May play a role in src signaling pathway; Belongs to the SKAP family
kmeans	1	Red	50	SNAI2	9606.ENSP00000380034	Zinc finger protein SNAI2; Transcriptional repressor that modulates both activator- dependent and basal transcription. Involved in the generation and migration of neural crest cells. Plays a role in mediating RAF1- induced transcriptional repression of the TJ protein, occludin (OCLN) and subsequent oncogenic transformation of epithelial cells (By similarity). Represses BRCA2 expression by binding…
kmeans	1	Red	50	SRGN	9606.ENSP00000242465	Proteoglycan peptide core protein; Serglycin; Plays a role in formation of mast cell secretory granules and mediates storage of various compounds in secretory vesicles. Required for storage of some proteases in both connective tissue and mucosal mast cells and for storage of granzyme B in T-lymphocytes. Plays a role in localizing neutrophil elastase in azurophil granules of neutrophils. Mediates …
kmeans	1	Red	50	TAGAP	9606.ENSP00000356033	T-cell activation Rho GTPase-activating protein; May function as a GTPase-activating protein and may play important roles during T-cell activation
kmeans	1	Red	50	TGFB1	9606.ENSP00000221930	Transforming growth factor beta-1; Multifunctional protein that controls proliferation, differentiation and other functions in many cell types. Many cells synthesize TGFB1 and have specific receptors for it. It positively and negatively regulates many other growth factors. It plays an important role in bone remodeling as it is a potent stimulator of osteoblastic bone formation, causing chemotaxis…
kmeans	1	Red	50	TIGIT	9606.ENSP00000419085	T-cell immunoreceptor with Ig and ITIM domains; Binds with high affinity to the poliovirus receptor (PVR) which causes increased secretion of IL10 and decreased secretion of IL12B and suppresses T-cell activation by promoting the generation of mature immunoregulatory dendritic cells; V-set domain containing
kmeans	1	Red	50	VEGFA	9606.ENSP00000478570	Vascular endothelial growth factor A; Growth factor active in angiogenesis, vasculogenesis and endothelial cell growth. Induces endothelial cell proliferation, promotes cell migration, inhibits apoptosis and induces permeabilization of blood vessels. Binds to the FLT1/VEGFR1 and KDR/VEGFR2 receptors, heparan sulfate and heparin. NRP1/Neuropilin-1 binds isoforms VEGF-165 and VEGF-145. Isoform VEGF…
kmeans	1	Red	50	ZEB1	9606.ENSP00000354487	Zinc finger E-box-binding homeobox 1; Acts as a transcriptional repressor. Inhibits interleukin-2 (IL-2) gene expression. Enhances or represses the promoter activity of the ATP1A1 gene depending on the quantity of cDNA and on the cell type. Represses E-cadherin promoter and induces an epithelial-mesenchymal transition (EMT) by recruiting SMARCA4/BRG1. Represses BCL6 transcription in the presence …
kmeans	2	Yellow	20	BCL2	9606.ENSP00000381185	Apoptosis regulator Bcl-2; Suppresses apoptosis in a variety of cell systems including factor-dependent lymphohematopoietic and neural cells. Regulates cell death by controlling the mitochondrial membrane permeability. Appears to function in a feedback loop system with caspases. Inhibits caspase activity either by preventing the release of cytochrome c from the mitochondria and/or by binding to t…
kmeans	2	Yellow	20	BCL2L11	9606.ENSP00000376943	Bcl-2-like protein 11; Induces apoptosis and anoikis. Isoform BimL is more potent than isoform BimEL. Isoform Bim-alpha1, isoform Bim-alpha2 and isoform Bim-alpha3 induce apoptosis, although less potent than isoform BimEL, isoform BimL and isoform BimS. Isoform Bim-gamma induces apoptosis. Isoform Bim-alpha3 induces apoptosis possibly through a caspase-mediated pathway. Isoform BimAC and isoform …
kmeans	2	Yellow	20	BUB1	9606.ENSP00000302530	Mitotic checkpoint serine/threonine-protein kinase BUB1; Serine/threonine-protein kinase that performs 2 crucial functions during mitosis: it is essential for spindle-assembly checkpoint signaling and for correct chromosome alignment. Has a key role in the assembly of checkpoint proteins at the kinetochore, being required for the subsequent localization of CENPF, BUB1B, CENPE and MAD2L1. Required…
kmeans	2	Yellow	20	CCNB2	9606.ENSP00000288207	G2/mitotic-specific cyclin-B2; Essential for the control of the cell cycle at the G2/M (mitosis) transition; Belongs to the cyclin family. Cyclin AB subfamily
kmeans	2	Yellow	20	CD37	9606.ENSP00000325708	Leukocyte antigen CD37; CD37 molecule
kmeans	2	Yellow	20	CDK1	9606.ENSP00000378699	Cyclin-dependent kinase 1; Plays a key role in the control of the eukaryotic cell cycle by modulating the centrosome cycle as well as mitotic onset; promotes G2-M transition, and regulates G1 progress and G1-S transition via association with multiple interphase cyclins. Required in higher cells for entry into S-phase and mitosis. Phosphorylates PARVA/actopaxin, APC, AMPH, APC, BARD1, Bcl- xL/BCL2…
kmeans	2	Yellow	20	CDKN3	9606.ENSP00000335357	Cyclin-dependent kinase inhibitor 3; May play a role in cell cycle regulation. Dual specificity phosphatase active toward substrates containing either phosphotyrosine or phosphoserine residues. Dephosphorylates CDK2 at 'Thr-160' in a cyclin-dependent manner; CDC14 phosphatases
kmeans	2	Yellow	20	FOXM1	9606.ENSP00000342307	Forkhead box protein M1; Transcriptional factor regulating the expression of cell cycle genes essential for DNA replication and mitosis. Plays a role in the control of cell proliferation. Plays also a role in DNA breaks repair participating in the DNA damage checkpoint response; Forkhead boxes
kmeans	2	Yellow	20	GADD45GIP1	9606.ENSP00000323065	Growth arrest and DNA damage-inducible proteins-interacting protein 1; Acts as a negative regulator of G1 to S cell cycle phase progression by inhibiting cyclin-dependent kinases. Inhibitory effects are additive with GADD45 proteins but occurs also in the absence of GADD45 proteins. Acts as a repressor of the orphan nuclear receptor NR4A1 by inhibiting AB domain-mediated transcriptional activity.…
kmeans	2	Yellow	20	IKZF3	9606.ENSP00000344544	Zinc finger protein Aiolos; Transcription factor that plays an important role in the regulation of lymphocyte differentiation. Plays an essential role in regulation of B-cell differentiation, proliferation and maturation to an effector state. Involved in regulating BCL2 expression and controlling apoptosis in T-cells in an IL2- dependent manner; Belongs to the Ikaros C2H2-type zinc-finger protein…
kmeans	2	Yellow	20	LMNA	9606.ENSP00000357283	Prelamin-A/C; Lamins are components of the nuclear lamina, a fibrous layer on the nucleoplasmic side of the inner nuclear membrane, which is thought to provide a framework for the nuclear envelope and may also interact with chromatin. Lamin A and C are present in equal amounts in the lamina of mammals. Plays an important role in nuclear assembly, chromatin organization, nuclear membrane and telom…
kmeans	2	Yellow	20	MAD2L1	9606.ENSP00000296509	Mitotic spindle assembly checkpoint protein MAD2A; Component of the spindle-assembly checkpoint that prevents the onset of anaphase until all chromosomes are properly aligned at the metaphase plate. Required for the execution of the mitotic checkpoint which monitors the process of kinetochore- spindle attachment and inhibits the activity of the anaphase promoting complex by sequestering CDC20 unt…
kmeans	2	Yellow	20	MELK	9606.ENSP00000298048	Maternal embryonic leucine zipper kinase; Serine/threonine-protein kinase involved in various processes such as cell cycle regulation, self-renewal of stem cells, apoptosis and splicing regulation. Has a broad substrate specificity; phosphorylates BCL2L14, CDC25B, MAP3K5/ASK1 and ZNF622. Acts as an activator of apoptosis by phosphorylating and activating MAP3K5/ASK1. Acts as a regulator of cell c…
kmeans	2	Yellow	20	MKI67	9606.ENSP00000357643	Proliferation marker protein Ki-67; Required to maintain individual mitotic chromosomes dispersed in the cytoplasm following nuclear envelope disassembly. Associates with the surface of the mitotic chromosome, the perichromosomal layer, and covers a substantial fraction of the chromosome surface. Prevents chromosomes from collapsing into a single chromatin mass by forming a steric and electrostat…
kmeans	2	Yellow	20	MYC	9606.ENSP00000479618	Myc proto-oncogene protein; Transcription factor that binds DNA in a non-specific manner, yet also specifically recognizes the core sequence 5'- CAC[GA]TG-3'. Activates the transcription of growth-related genes. Binds to the VEGFA promoter, promoting VEGFA production and subsequent sprouting angiogenesis; Basic helix-loop-helix proteins
kmeans	2	Yellow	20	NFATC1	9606.ENSP00000389377	Nuclear factor of activated T-cells, cytoplasmic 1; Plays a role in the inducible expression of cytokine genes in T-cells, especially in the induction of the IL-2 or IL-4 gene transcription. Also controls gene expression in embryonic cardiac cells. Could regulate not only the activation and proliferation but also the differentiation and programmed death of T-lymphocytes as well as lymphoid and no…
kmeans	2	Yellow	20	POLR2A	9606.ENSP00000480158	DNA-directed RNA polymerase II subunit RPB1; DNA-dependent RNA polymerase catalyzes the transcription of DNA into RNA using the four ribonucleoside triphosphates as substrates. Largest and catalytic component of RNA polymerase II which synthesizes mRNA precursors and many functional non-coding RNAs. Forms the polymerase active center together with the second largest subunit. Pol II is the central…
kmeans	2	Yellow	20	PRDM1	9606.ENSP00000358092	PR domain zinc finger protein 1; Transcription factor that mediates a transcriptional program in various innate and adaptive immune tissue-resident lymphocyte T cell types such as tissue-resident memory T (Trm), natural killer (trNK) and natural killer T (NKT) cells and negatively regulates gene expression of proteins that promote the egress of tissue-resident T-cell populations from non-lymphoid…
kmeans	2	Yellow	20	RB1	9606.ENSP00000267163	Retinoblastoma-associated protein; Key regulator of entry into cell division that acts as a tumor suppressor. Promotes G0-G1 transition when phosphorylated by CDK3/cyclin-C. Acts as a transcription repressor of E2F1 target genes. The underphosphorylated, active form of RB1 interacts with E2F1 and represses its transcription activity, leading to cell cycle arrest. Directly involved in heterochroma…
kmeans	2	Yellow	20	TOP2A	9606.ENSP00000411532	DNA topoisomerase 2-alpha; Control of topological states of DNA by transient breakage and subsequent rejoining of DNA strands. Topoisomerase II makes double-strand breaks. Essential during mitosis and meiosis for proper segregation of daughter chromosomes. May play a role in regulating the period length of ARNTL/BMAL1 transcriptional oscillation (By similarity); Topoisomerases
kmeans	3	Green	35	AKT1	9606.ENSP00000451828	RAC-alpha serine/threonine-protein kinase; AKT1 is one of 3 closely related serine/threonine- protein kinases (AKT1, AKT2 and AKT3) called the AKT kinase, and which regulate many processes including metabolism, proliferation, cell survival, growth and angiogenesis. This is mediated through serine and/or threonine phosphorylation of a range of downstream substrates. Over 100 substrate candidates h…
kmeans	3	Green	35	CCL17	9606.ENSP00000219244	C-C motif chemokine 17; Chemotactic factor for T-lymphocytes but not monocytes or granulocytes. May play a role in T-cell development in thymus and in trafficking and activation of mature T-cells. Binds to CCR4; Belongs to the intercrine beta (chemokine CC) family
kmeans	3	Green	35	CCL22	9606.ENSP00000219235	C-C motif chemokine 22; May play a role in the trafficking of activated/effector T-lymphocytes to inflammatory sites and other aspects of activated T-lymphocyte physiology. Chemotactic for monocytes, dendritic cells and natural killer cells. Mild chemoattractant for primary activated T-lymphocytes and a potent chemoattractant for chronically activated T-lymphocytes but has no chemoattractant acti…
kmeans	3	Green	35	CCR4	9606.ENSP00000332659	C-C chemokine receptor type 4; High affinity receptor for the C-C type chemokines CCL17/TARC, CCL22/MDC and CKLF isoform 1/CKLF1. The activity of this receptor is mediated by G(i) proteins which activate a phosphatidylinositol-calcium second messenger system. Can function as a chemoattractant homing receptor on circulating memory lymphocytes and as a coreceptor for some primary HIV-2 isolates. In…
kmeans	3	Green	35	CIITA	9606.ENSP00000485010	MHC class II transactivator; Essential for transcriptional activity of the HLA class II promoter; activation is via the proximal promoter. No DNA binding of in vitro translated CIITA was detected. May act in a coactivator-like fashion through protein-protein interactions by contacting factors binding to the proximal MHC class II promoter, to elements of the transcription machinery, or both. Alter…
kmeans	3	Green	35	CSF2RB	9606.ENSP00000384053	Cytokine receptor common subunit beta; High affinity receptor for interleukin-3, interleukin-5 and granulocyte-macrophage colony-stimulating factor; CD molecules
kmeans	3	Green	35	CX3CL1	9606.ENSP00000006053	C-X3-C motif chemokine ligand 1; Fractalkine; Acts as a ligand for both CX3CR1 and integrins. Binds to CX3CR1. Binds to integrins ITGAV:ITGB3 and ITGA4:ITGB1. Can activate integrins in both a CX3CR1-dependent and CX3CR1-independent manner. In the presence of CX3CR1, activates integrins by binding to the classical ligand-binding site (site 1) in integrins. In the absence of CX3CR1, binds to a seco…
kmeans	3	Green	35	CXCL10	9606.ENSP00000305651	C-X-C motif chemokine 10; Chemotactic for monocytes and T-lymphocytes. Binds to CXCR3; Belongs to the intercrine alpha (chemokine CxC) family
kmeans	3	Green	35	CXCR2	9606.ENSP00000319635	C-X-C chemokine receptor type 2; Receptor for interleukin-8 which is a powerful neutrophil chemotactic factor. Binding of IL-8 to the receptor causes activation of neutrophils. This response is mediated via a G-protein that activates a phosphatidylinositol-calcium second messenger system. Binds to IL-8 with high affinity. Also binds with high affinity to CXCL3, GRO/MGSA and NAP-2
kmeans	3	Green	35	EOMES	9606.ENSP00000388620	Eomesodermin homolog; Functions as a transcriptional activator playing a crucial role during development. Functions in trophoblast differentiation and later in gastrulation, regulating both mesoderm delamination and endoderm specification. Plays a role in brain development being required for the specification and the proliferation of the intermediate progenitor cells and their progeny in the cere…
kmeans	3	Green	35	GBP1	9606.ENSP00000359504	Guanylate-binding protein 1/3/4/7; Guanylate-binding protein 1; Hydrolyzes GTP to GMP in 2 consecutive cleavage reactions. Exhibits antiviral activity against influenza virus. Promote oxidative killing and deliver antimicrobial peptides to autophagolysosomes, providing broad host protection against different pathogen classes
kmeans	3	Green	35	HLA-A	9606.ENSP00000379873	HLA class I histocompatibility antigen, A-3 alpha chain; Involved in the presentation of foreign antigens to the immune system; C1-set domain containing
kmeans	3	Green	35	HLA-B	9606.ENSP00000399168	HLA class I histocompatibility antigen, B-7 alpha chain; Involved in the presentation of foreign antigens to the immune system; C1-set domain containing
kmeans	3	Green	35	HLA-C	9606.ENSP00000365402	HLA class I histocompatibility antigen, Cw-7 alpha chain; Involved in the presentation of foreign antigens to the immune system; Belongs to the MHC class I family
kmeans	3	Green	35	HLA-E	9606.ENSP00000365817	HLA class I histocompatibility antigen, alpha chain E; Preferably binds to a peptide derived from the signal sequence of most HLA-A, -B, -C and -G molecules; Belongs to the MHC class I family
kmeans	3	Green	35	IFI44L	9606.ENSP00000359787	Interferon-induced protein 44-like; Exhibits a low antiviral activity against hepatitis C virus; Belongs to the IFI44 family
kmeans	3	Green	35	IFIH1	9606.ENSP00000263642	Interferon-induced helicase C domain-containing protein 1; Innate immune receptor which acts as a cytoplasmic sensor of viral nucleic acids and plays a major role in sensing viral infection and in the activation of a cascade of antiviral responses including the induction of type I interferons and proinflammatory cytokines. Its ligands include mRNA lacking 2'-O- methylation at their 5' cap and lon…
kmeans	3	Green	35	IFITM1	9606.ENSP00000386187	Interferon-induced transmembrane protein 1; IFN-induced antiviral protein which inhibits the entry of viruses to the host cell cytoplasm, permitting endocytosis, but preventing subsequent viral fusion and release of viral contents into the cytosol. Active against multiple viruses, including influenza A virus, SARS coronavirus (SARS-CoV), Marburg virus (MARV), Ebola virus (EBOV), Dengue virus (DNV…
kmeans	3	Green	35	IL12A	9606.ENSP00000303231	Interleukin-12 subunit alpha; Cytokine that can act as a growth factor for activated T and NK cells, enhance the lytic activity of NK/lymphokine- activated Killer cells, and stimulate the production of IFN-gamma by resting PBMC; Interleukins
kmeans	3	Green	35	IL2RB	9606.ENSP00000216223	Interleukin-2 receptor subunit beta; Receptor for interleukin-2. This beta subunit is involved in receptor mediated endocytosis and transduces the mitogenic signals of IL2; Belongs to the type I cytokine receptor family. Type 4 subfamily
kmeans	3	Green	35	IL2RG	9606.ENSP00000363318	Cytokine receptor common subunit gamma; Common subunit for the receptors for a variety of interleukins; CD molecules
kmeans	3	Green	35	MAPK1	9606.ENSP00000215832	Mitogen-activated protein kinase 1; Serine/threonine kinase which acts as an essential component of the MAP kinase signal transduction pathway. MAPK1/ERK2 and MAPK3/ERK1 are the 2 MAPKs which play an important role in the MAPK/ERK cascade. They participate also in a signaling cascade initiated by activated KIT and KITLG/SCF. Depending on the cellular context, the MAPK/ERK cascade mediates diverse…
kmeans	3	Green	35	MX1	9606.ENSP00000381601	Interferon-induced GTP-binding protein Mx1; Interferon-induced dynamin-like GTPase with antiviral activity against a wide range of RNA viruses and some DNA viruses. Its target viruses include negative-stranded RNA viruses and HBV through binding and inactivation of their ribonucleocapsid. May also antagonize reoviridae and asfarviridae replication. Inhibits thogoto virus (THOV) replication by pre…
kmeans	3	Green	35	NOTCH3	9606.ENSP00000263388	Neurogenic locus notch homolog protein 3; Functions as a receptor for membrane-bound ligands Jagged1, Jagged2 and Delta1 to regulate cell-fate determination. Upon ligand activation through the released notch intracellular domain (NICD) it forms a transcriptional activator complex with RBPJ/RBPSUH and activates genes of the enhancer of split locus. Affects the implementation of differentiation, pr…
kmeans	3	Green	35	OAS1	9606.ENSP00000388001	2'-5'-oligoadenylate synthetase 1; 2'-5'-oligoadenylate synthase 1; Interferon-induced, dsRNA-activated antiviral enzyme which plays a critical role in cellular innate antiviral response. In addition, it may also play a role in other cellular processes such as apoptosis, cell growth, differentiation and gene regulation. Synthesizes higher oligomers of 2'-5'-oligoadenylates (2-5A) from ATP which t…
kmeans	3	Green	35	OAS2	9606.ENSP00000342278	2'-5'-oligoadenylate synthetase 2; 2'-5'-oligoadenylate synthase 2; Interferon-induced, dsRNA-activated antiviral enzyme which plays a critical role in cellular innate antiviral response. In addition, it may also play a role in other cellular processes such as apoptosis, cell growth, differentiation and gene regulation. Synthesizes higher oligomers of 2'-5'-oligoadenylates (2-5A) from ATP which t…
kmeans	3	Green	35	OAS3	9606.ENSP00000228928	2'-5'-oligoadenylate synthetase 3; 2'-5'-oligoadenylate synthase 3; Interferon-induced, dsRNA-activated antiviral enzyme which plays a critical role in cellular innate antiviral response. In addition, it may also play a role in other cellular processes such as apoptosis, cell growth, differentiation and gene regulation. Synthesizes preferentially dimers of 2'-5'- oligoadenylates (2-5A) from ATP w…
kmeans	3	Green	35	PTPN11	9606.ENSP00000340944	Tyrosine-protein phosphatase non-receptor type 11; Acts downstream of various receptor and cytoplasmic protein tyrosine kinases to participate in the signal transduction from the cell surface to the nucleus. Positively regulates MAPK signal transduction pathway. Dephosphorylates GAB1, ARHGAP35 and EGFR. Dephosphorylates ROCK2 at 'Tyr-722' resulting in stimulatation of its RhoA binding activity. D…
kmeans	3	Green	35	PTPN6	9606.ENSP00000391592	Tyrosine-protein phosphatase non-receptor type 6; Modulates signaling by tyrosine phosphorylated cell surface receptors such as KIT and the EGF receptor/EGFR. The SH2 regions may interact with other cellular components to modulate its own phosphatase activity against interacting substrates. Together with MTUS1, induces UBE2V2 expression upon angiotensin II stimulation. Plays a key role in hematop…
kmeans	3	Green	35	SAMHD1	9606.ENSP00000262878	Deoxynucleoside triphosphate triphosphohydrolase SAMHD1; Host restriction nuclease involved in defense response to virus. Has dNTPase activity and reduces cellular dNTP levels to levels too low for retroviral reverse transcription to occur. Blocks early-stage virus replication in dendritic and other myeloid cells. Likewise, suppresses LINE-1 retrotransposon activity. May play a role in mediating …
kmeans	3	Green	35	STAT1	9606.ENSP00000354394	Signal transducer and activator of transcription 1-alpha/beta; Signal transducer and transcription activator that mediates cellular responses to interferons (IFNs), cytokine KITLG/SCF and other cytokines and other growth factors. Following type I IFN (IFN-alpha and IFN-beta) binding to cell surface receptors, signaling via protein kinases leads to activation of Jak kinases (TYK2 and JAK1) and to …
kmeans	3	Green	35	STAT3	9606.ENSP00000264657	Signal transducer and activator of transcription 3; Signal transducer and transcription activator that mediates cellular responses to interleukins, KITLG/SCF, LEP and other growth factors. Once activated, recruits coactivators, such as NCOA1 or MED1, to the promoter region of the target gene. May mediate cellular responses to activated FGFR1, FGFR2, FGFR3 and FGFR4. Binds to the interleukin-6 (IL…
kmeans	3	Green	35	STAT5A	9606.ENSP00000341208	Signal transducer and activator of transcription 5A; Carries out a dual function: signal transduction and activation of transcription. Mediates cellular responses to the cytokine KITLG/SCF and other growth factors. Mediates cellular responses to ERBB4. May mediate cellular responses to activated FGFR1, FGFR2, FGFR3 and FGFR4. Binds to the GAS element and activates PRL-induced transcription. Regul…
kmeans	3	Green	35	TCF7	9606.ENSP00000340347	Transcription factor 7; Transcriptional activator involved in T-cell lymphocyte differentiation. Necessary for the survival of CD4(+) CD8(+) immature thymocytes. Isoforms lacking the N-terminal CTNNB1 binding domain cannot fulfill this role. Binds to the T- lymphocyte-specific enhancer element (5'-WWCAAAG-3') found in the promoter of the CD3E gene. May also act as feedback transcriptional repress…
kmeans	3	Green	35	TDO2	9606.ENSP00000444788	Tryptophan 2,3-dioxygenase; Heme-dependent dioxygenase that catalyzes the oxidative cleavage of the L-tryptophan (L-Trp) pyrrole ring and converts L- tryptophan to N-formyl-L-kynurenine. Catalyzes the oxidative cleavage of the indole moiety
kmeans	4	Cyan	62	B7RP1	9606.ENSP00000339477	Inducible T-cell co-stimulator ligand; Ligand for the T-cell-specific cell surface receptor ICOS. Acts as a costimulatory signal for T-cell proliferation and cytokine secretion; induces also B-cell proliferation and differentiation into plasma cells. Could play an important role in mediating local tissue responses to inflammatory conditions, as well as in modulating the secondary immune response …
kmeans	4	Cyan	62	BTLA	9606.ENSP00000333919	B- and T-lymphocyte attenuator; Lymphocyte inhibitory receptor which inhibits lymphocytes during immune response; CD molecules
kmeans	4	Cyan	62	CCL21	9606.ENSP00000259607	C-C motif chemokine 21; Inhibits hemopoiesis and stimulates chemotaxis. Chemotactic in vitro for thymocytes and activated T-cells, but not for B-cells, macrophages, or neutrophils. Shows preferential activity towards naive T-cells. May play a role in mediating homing of lymphocytes to secondary lymphoid organs. Binds to atypical chemokine receptor ACKR4 and mediates the recruitment of beta-arrest…
kmeans	4	Cyan	62	CCL5	9606.ENSP00000474412	C-C motif chemokine 5; Chemoattractant for blood monocytes, memory T-helper cells and eosinophils. Causes the release of histamine from basophils and activates eosinophils. May activate several chemokine receptors including CCR1, CCR3, CCR4 and CCR5. One of the major HIV-suppressive factors produced by CD8+ T-cells. Recombinant RANTES protein induces a dose-dependent inhibition of different strai…
kmeans	4	Cyan	62	CCR7	9606.ENSP00000246657	C-C chemokine receptor type 7; Receptor for the MIP-3-beta chemokine. Probable mediator of EBV effects on B-lymphocytes or of normal lymphocyte functions; Belongs to the G-protein coupled receptor 1 family
kmeans	4	Cyan	62	CD1C	9606.ENSP00000357152	T-cell surface glycoprotein CD1c; Antigen-presenting protein that binds self and non-self lipid and glycolipid antigens and presents them to T-cell receptors on natural killer T-cells; C1-set domain containing
kmeans	4	Cyan	62	CD2	9606.ENSP00000358490	T-cell surface antigen CD2; CD2 interacts with lymphocyte function-associated antigen (LFA-3) and CD48/BCM1 to mediate adhesion between T-cells and other cell types. CD2 is implicated in the triggering of T- cells, the cytoplasmic domain is implicated in the signaling function; C2-set domain containing
kmeans	4	Cyan	62	CD247	9606.ENSP00000354782	T-cell surface glycoprotein CD3 zeta chain; Part of the TCR-CD3 complex present on T-lymphocyte cell surface that plays an essential role in adaptive immune response. When antigen presenting cells (APCs) activate T-cell receptor (TCR), TCR-mediated signals are transmitted across the cell membrane by the CD3 chains CD3D, CD3E, CD3G and CD3Z. All CD3 chains contain immunoreceptor tyrosine-based act…
kmeans	4	Cyan	62	CD27	9606.ENSP00000266557	Tumor necrosis factor receptor superfamily member 7; CD27 antigen; Receptor for CD70/CD27L. May play a role in survival of activated T-cells. May play a role in apoptosis through association with SIVA1
kmeans	4	Cyan	62	CD28	9606.ENSP00000324890	T-cell-specific surface glycoprotein CD28; Involved in T-cell activation, the induction of cell proliferation and cytokine production and promotion of T-cell survival. Enhances the production of IL4 and IL10 in T-cells in conjunction with TCR/CD3 ligation and CD40L costimulation. Isoform 3 enhances CD40L-mediated activation of NF-kappa-B and kinases MAPK8 and PAK2 in T-cells
kmeans	4	Cyan	62	CD3D	9606.ENSP00000300692	T-cell surface glycoprotein CD3 delta chain; Part of the TCR-CD3 complex present on T-lymphocyte cell surface that plays an essential role in adaptive immune response. When antigen presenting cells (APCs) activate T-cell receptor (TCR), TCR-mediated signals are transmitted across the cell membrane by the CD3 chains CD3D, CD3E, CD3G and CD3Z. All CD3 chains contain immunoreceptor tyrosine-based ac…
kmeans	4	Cyan	62	CD3E	9606.ENSP00000354566	T-cell surface glycoprotein CD3 epsilon chain; Part of the TCR-CD3 complex present on T-lymphocyte cell surface that plays an essential role in adaptive immune response. When antigen presenting cells (APCs) activate T-cell receptor (TCR), TCR-mediated signals are transmitted across the cell membrane by the CD3 chains CD3D, CD3E, CD3G and CD3Z. All CD3 chains contain immunoreceptor tyrosine-based …
kmeans	4	Cyan	62	CD3G	9606.ENSP00000431445	T-cell surface glycoprotein CD3 gamma chain; Part of the TCR-CD3 complex present on T-lymphocyte cell surface that plays an essential role in adaptive immune response. When antigen presenting cells (APCs) activate T-cell receptor (TCR), TCR-mediated signals are transmitted across the cell membrane by the CD3 chains CD3D, CD3E, CD3G and CD3Z. All CD3 chains contain immunoreceptor tyrosine-based ac…
kmeans	4	Cyan	62	CD4	9606.ENSP00000011653	T-cell surface glycoprotein CD4; Integral membrane glycoprotein that plays an essential role in the immune response and serves multiple functions in responses against both external and internal offenses. In T-cells, functions primarily as a coreceptor for MHC class II molecule:peptide complex. The antigens presented by class II peptides are derived from extracellular proteins while class I peptid…
kmeans	4	Cyan	62	CD40LG	9606.ENSP00000359663	CD40 ligand; Cytokine that binds to CD40/TNFRSF5. Costimulates T-cell proliferation and cytokine production. Its cross-linking on T-cells generates a costimulatory signal which enhances the production of IL4 and IL10 in conjunction with the TCR/CD3 ligation and CD28 costimulation. Induces the activation of NF-kappa-B and kinases MAPK8 and PAK2 in T- cells. Induces tyrosine phosphorylation of isof…
kmeans	4	Cyan	62	CD48	9606.ENSP00000484431	CD48 molecule; CD48 antigen; Ligand for CD2. Might facilitate interaction between activated lymphocytes. Probably involved in regulating T-cell activation
kmeans	4	Cyan	62	CD52	9606.ENSP00000363330	CAMPATH-1 antigen; May play a role in carrying and orienting carbohydrate, as well as having a more specific role; CD molecules
kmeans	4	Cyan	62	CD69	9606.ENSP00000228434	Early activation antigen CD69; Involved in lymphocyte proliferation and functions as a signal transmitting receptor in lymphocytes, natural killer (NK) cells, and platelets; C-type lectin domain containing
kmeans	4	Cyan	62	CD83	9606.ENSP00000368450	CD83 antigen; May play a significant role in antigen presentation or the cellular interactions that follow lymphocyte activation; CD molecules
kmeans	4	Cyan	62	CD86	9606.ENSP00000332049	T-lymphocyte activation antigen CD86; Receptor involved in the costimulatory signal essential for T-lymphocyte proliferation and interleukin-2 production, by binding CD28 or CTLA-4. May play a critical role in the early events of T-cell activation and costimulation of naive T-cells, such as deciding between immunity and anergy that is made by T- cells within 24 hours after activation. Isoform 2 i…
kmeans	4	Cyan	62	CD8A	9606.ENSP00000386559	T-cell surface glycoprotein CD8 alpha chain; Integral membrane glycoprotein that plays an essential role in the immune response and serves multiple functions in responses against both external and internal offenses. In T-cells, functions primarily as a coreceptor for MHC class I molecule:peptide complex. The antigens presented by class I peptides are derived from cytosolic proteins while class II…
kmeans	4	Cyan	62	CD8B	9606.ENSP00000331172	T-cell surface glycoprotein CD8 beta chain; Integral membrane glycoprotein that plays an essential role in the immune response and serves multiple functions in responses against both external and internal offenses. In T-cells, functions primarily as a coreceptor for MHC class I molecule:peptide complex. The antigens presented by class I peptides are derived from cytosolic proteins while class II …
kmeans	4	Cyan	62	CXCL13	9606.ENSP00000286758	C-X-C motif chemokine 13; Chemotactic for B-lymphocytes but not for T-lymphocytes, monocytes and neutrophils. Does not induce calcium release in B- lymphocytes. Binds to BLR1/CXCR5; Chemokine ligands
kmeans	4	Cyan	62	CXCL9	9606.ENSP00000354901	C-X-C motif chemokine 9; Cytokine that affects the growth, movement, or activation state of cells that participate in immune and inflammatory response. Chemotactic for activated T-cells. Binds to CXCR3; Belongs to the intercrine alpha (chemokine CxC) family
kmeans	4	Cyan	62	CXCR4	9606.ENSP00000386884	C-X-C chemokine receptor type 4; Receptor for the C-X-C chemokine CXCL12/SDF-1 that transduces a signal by increasing intracellular calcium ion levels and enhancing MAPK1/MAPK3 activation. Acts as a receptor for extracellular ubiquitin; leading to enhanced intracellular calcium ions and reduced cellular cAMP levels. Involved in hematopoiesis and in cardiac ventricular septum formation. Also plays…
kmeans	4	Cyan	62	CXCR6	9606.ENSP00000395704	C-X-C chemokine receptor type 6; Receptor for the C-X-C chemokine CXCL16. Used as a coreceptor by SIVs and by strains of HIV-2 and m-tropic HIV-1
kmeans	4	Cyan	62	ENTPD1	9606.ENSP00000360250	Ectonucleoside triphosphate diphosphohydrolase 1; In the nervous system, could hydrolyze ATP and other nucleotides to regulate purinergic neurotransmission. Could also be implicated in the prevention of platelet aggregation by hydrolyzing platelet-activating ADP to AMP. Hydrolyzes ATP and ADP equally well; Belongs to the GDA1/CD39 NTPase family
kmeans	4	Cyan	62	FASLG	9606.ENSP00000356694	Tumor necrosis factor ligand superfamily member 6; Cytokine that binds to TNFRSF6/FAS, a receptor that transduces the apoptotic signal into cells. Involved in cytotoxic T-cell-mediated apoptosis, natural killer cell-mediated apoptosis and in T-cell development. Initiates fratricidal/suicidal activation-induced cell death (AICD) in antigen-activated T-cells contributing to the termination of immun…
kmeans	4	Cyan	62	FCGR2B	9606.ENSP00000351497	Low affinity immunoglobulin gamma Fc region receptor II-b; Receptor for the Fc region of complexed or aggregated immunoglobulins gamma. Low affinity receptor. Involved in a variety of effector and regulatory functions such as phagocytosis of immune complexes and modulation of antibody production by B- cells. Binding to this receptor results in down-modulation of previous state of cell activation …
kmeans	4	Cyan	62	FCGR3A	9606.ENSP00000356946	Low affinity immunoglobulin gamma Fc region receptor III-A; Receptor for the Fc region of IgG. Binds complexed or aggregated IgG and also monomeric IgG. Mediates antibody-dependent cellular cytotoxicity (ADCC) and other antibody-dependent responses, such as phagocytosis; CD molecules
kmeans	4	Cyan	62	FCGR3B	9606.ENSP00000433642	Low affinity immunoglobulin gamma Fc region receptor III-B; Receptor for the Fc region of immunoglobulins gamma. Low affinity receptor. Binds complexed or aggregated IgG and also monomeric IgG. Contrary to III-A, is not capable to mediate antibody-dependent cytotoxicity and phagocytosis. May serve as a trap for immune complexes in the peripheral circulation which does not activate neutrophils; CD…
kmeans	4	Cyan	62	GATA3	9606.ENSP00000368632	Trans-acting T-cell-specific transcription factor GATA-3; Transcriptional activator which binds to the enhancer of the T-cell receptor alpha and delta genes. Binds to the consensus sequence 5'-AGATAG-3'. Required for the T-helper 2 (Th2) differentiation process following immune and inflammatory responses; GATA zinc finger domain containing
kmeans	4	Cyan	62	GPR29	9606.ENSP00000343952	Chemokine (C-C motif) receptor 6; Receptor for the C-C type chemokine CCL20. Binds to CCL20 and subsequently transduces a signal by increasing the intracellular calcium ion levels. Although CCL20 is its major ligand it can also act as a receptor for non-chemokine ligands such as beta-defensins. Binds to defensin DEFB1 leading to increase in intracellular calcium ions and cAMP levels. Its binding …
kmeans	4	Cyan	62	GRAP2	9606.ENSP00000339186	GRB2-related adapter protein 2; Interacts with SLP-76 to regulate NF-AT activation. Binds to tyrosine-phosphorylated shc; SH2 domain containing
kmeans	4	Cyan	62	GZMB	9606.ENSP00000216341	Granzyme B; This enzyme is necessary for target cell lysis in cell- mediated immune responses. It cleaves after Asp. Seems to be linked to an activation cascade of caspases (aspartate-specific cysteine proteases) responsible for apoptosis execution. Cleaves caspase-3, -7, -9 and 10 to give rise to active enzymes mediating apoptosis; Belongs to the peptidase S1 family. Granzyme subfamily
kmeans	4	Cyan	62	HLA-DMA	9606.ENSP00000363976	Major histocompatibility complex, class ii, dm alpha; HLA class II histocompatibility antigen, DM alpha chain; Plays a critical role in catalyzing the release of class II-associated invariant chain peptide (CLIP) from newly synthesized MHC class II molecules and freeing the peptide binding site for acquisition of antigenic peptides. In B-cells, the interaction between HLA-DM and MHC class II mole…
kmeans	4	Cyan	62	HLA-DMB	9606.ENSP00000398890	HLA class II histocompatibility antigen, DM beta chain; Plays a critical role in catalyzing the release of class II-associated invariant chain peptide (CLIP) from newly synthesized MHC class II molecules and freeing the peptide binding site for acquisition of antigenic peptides. In B-cells, the interaction between HLA-DM and MHC class II molecules is regulated by HLA-DO
kmeans	4	Cyan	62	HLA-DOB	9606.ENSP00000390020	Major histocompatibility complex, class ii, do beta; HLA class II histocompatibility antigen, DO beta chain; Important modulator in the HLA class II restricted antigen presentation pathway by interaction with the HLA-DM molecule in B-cells. Modifies peptide exchange activity of HLA-DM
kmeans	4	Cyan	62	HLA-DRA	9606.ENSP00000378786	Major histocompatibility complex, class ii, dr alpha; HLA class II histocompatibility antigen, DR alpha chain; Binds peptides derived from antigens that access the endocytic route of antigen presenting cells (APC) and presents them on the cell surface for recognition by the CD4 T-cells. The peptide binding cleft accommodates peptides of 10-30 residues. The peptides presented by MHC class II molec…
kmeans	4	Cyan	62	HLA-DRB1	9606.ENSP00000353099	HLA class II histocompatibility antigen, DRB1-15 beta chain; Binds peptides derived from antigens that access the endocytic route of antigen presenting cells (APC) and presents them on the cell surface for recognition by the CD4 T-cells. The peptide binding cleft accommodates peptides of 10-30 residues. The peptides presented by MHC class II molecules are generated mostly by degradation of protei…
kmeans	4	Cyan	62	ICOS	9606.ENSP00000319476	Inducible t-cell co-stimulator; Inducible T-cell costimulator; Enhances all basic T-cell responses to a foreign antigen, namely proliferation, secretion of lymphokines, up- regulation of molecules that mediate cell-cell interaction, and effective help for antibody secretion by B-cells. Essential both for efficient interaction between T and B-cells and for normal antibody responses to T-cell depen…
kmeans	4	Cyan	62	IDO1	9606.ENSP00000430950	Indoleamine 2,3-dioxygenase 1; Catalyzes the first and rate limiting step of the catabolism of the essential amino acid tryptophan along the kynurenine pathway. Involved in the peripheral immune tolerance, contributing to maintain homeostasis by preventing autoimmunity or immunopathology that would result from uncontrolled and overreacting immune responses. Tryptophan shortage inhibits T lymphocy…
kmeans	4	Cyan	62	IKZF1	9606.ENSP00000331614	DNA-binding protein Ikaros; Transcription regulator of hematopoietic cell differentiation. Binds gamma-satellite DNA. Plays a role in the development of lymphocytes, B- and T-cells. Binds and activates the enhancer (delta-A element) of the CD3-delta gene. Repressor of the TDT (fikzfterminal deoxynucleotidyltransferase) gene during thymocyte differentiation. Regulates transcription through associa…
kmeans	4	Cyan	62	IL7R	9606.ENSP00000306157	Interleukin-7 receptor subunit alpha; Receptor for interleukin-7. Also acts as a receptor for thymic stromal lymphopoietin (TSLP); Belongs to the type I cytokine receptor family. Type 4 subfamily
kmeans	4	Cyan	62	ITGAX	9606.ENSP00000454623	Integrin subunit alpha x; Integrin alpha-X; Integrin alpha-X/beta-2 is a receptor for fibrinogen. It recognizes the sequence G-P-R in fibrinogen. It mediates cell-cell interaction during inflammatory responses. It is especially important in monocyte adhesion and chemotaxis
kmeans	4	Cyan	62	ITK	9606.ENSP00000398655	Tyrosine-protein kinase ITK/TSK; Tyrosine kinase that plays an essential role in regulation of the adaptive immune response. Regulates the development, function and differentiation of conventional T-cells and nonconventional NKT-cells. When antigen presenting cells (APC) activate T-cell receptor (TCR), a series of phosphorylation lead to the recruitment of ITK to the cell membrane, in the vicinit…
kmeans	4	Cyan	62	KLRB1	9606.ENSP00000229402	Killer cell lectin-like receptor subfamily B member 1; Plays an inhibitory role on natural killer (NK) cells cytotoxicity. Activation results in specific acid sphingomyelinase/SMPD1 stimulation with subsequent marked elevation of intracellular ceramide. Activation also leads to AKT1/PKB and RPS6KA1/RSK1 kinases stimulation as well as markedly enhanced T-cell proliferation induced by anti-CD3. Act…
kmeans	4	Cyan	62	KLRD1	9606.ENSP00000371333	Natural killer cells antigen CD94; Plays a role as a receptor for the recognition of MHC class I HLA-E molecules by NK cells and some cytotoxic T-cells; C-type lectin domain containing
kmeans	4	Cyan	62	KLRG1	9606.ENSP00000349477	Killer cell lectin-like receptor subfamily G member 1; Plays an inhibitory role on natural killer (NK) cells and T-cell functions upon binding to their non-MHC ligands. May mediate missing self recognition by binding to a highly conserved site on classical cadherins, enabling it to monitor expression of E-cadherin/CDH1, N-cadherin/CDH2 and R-cadherin/CDH4 on target cells; C-type lectin domain con…
kmeans	4	Cyan	62	KLRK1	9606.ENSP00000240618	Killer cell lectin-like receptor subfamily K, member 1; Function as an activating and costimulatory receptor involved in immunosurveillance upon binding to various cellular stress-inducible ligands displayed at the surface of autologous tumor cells and virus-infected cells. Provides both stimulatory and costimulatory innate immune responses on activated killer (NK) cells, leading to cytotoxic act…
kmeans	4	Cyan	62	LAMP1	9606.ENSP00000333298	Lysosome-associated membrane glycoprotein 1; Presents carbohydrate ligands to selectins. Also implicated in tumor cell metastasis; CD molecules
kmeans	4	Cyan	62	MRC1	9606.ENSP00000455897	Macrophage mannose receptor 1; Mediates the endocytosis of glycoproteins by macrophages. Binds both sulfated and non-sulfated polysaccharide chains; C-type lectin domain containing
kmeans	4	Cyan	62	NCAM1	9606.ENSP00000480132	Neural cell adhesion molecule 1; This protein is a cell adhesion molecule involved in neuron-neuron adhesion, neurite fasciculation, outgrowth of neurites, etc; CD molecules
kmeans	4	Cyan	62	PIK3CA	9606.ENSP00000263967	Phosphatidylinositol 4,5-bisphosphate 3-kinase catalytic subunit alpha isoform; Phosphoinositide-3-kinase (PI3K) that phosphorylates PtdIns (Phosphatidylinositol), PtdIns4P (Phosphatidylinositol 4- phosphate) and PtdIns(4,5)P2 (Phosphatidylinositol 4,5- bisphosphate) to generate phosphatidylinositol 3,4,5-trisphosphate (PIP3). PIP3 plays a key role by recruiting PH domain-containing proteins to t…
kmeans	4	Cyan	62	PTPRC	9606.ENSP00000411355	Receptor-type tyrosine-protein phosphatase C; Protein tyrosine-protein phosphatase required for T-cell activation through the antigen receptor. Acts as a positive regulator of T-cell coactivation upon binding to DPP4. The first PTPase domain has enzymatic activity, while the second one seems to affect the substrate specificity of the first one. Upon T-cell activation, recruits and dephosphorylate…
kmeans	4	Cyan	62	RORC	9606.ENSP00000327025	Rar-related orphan receptor gamma; Nuclear receptor ROR-gamma; Nuclear receptor that binds DNA as a monomer to ROR response elements (RORE) containing a single core motif half-site 5'-AGGTCA-3' preceded by a short A-T-rich sequence. Key regulator of cellular differentiation, immunity, peripheral circadian rhythm as well as lipid, steroid, xenobiotics and glucose metabolism. Considered to have int…
kmeans	4	Cyan	62	SELL	9606.ENSP00000236147	L-selectin; Cell surface adhesion protein. Mediates the adherence of lymphocytes to endothelial cells of high endothelial venules in peripheral lymph nodes. Promotes initial tethering and rolling of leukocytes in endothelia; C-type lectin domain containing
kmeans	4	Cyan	62	TBX21	9606.ENSP00000177694	T-box transcription factor TBX21; Lineage-defining transcription factor which initiates Th1 lineage development from naive Th precursor cells both by activating Th1 genetic programs and by repressing the opposing Th2 and Th17 genetic programs. Activates transcription of a set of genes important for Th1 cell function, including those encoding IFN-gamma and the chemokine receptor CXCR3. Activates I…
kmeans	4	Cyan	62	TFRC	9606.ENSP00000353224	Transferrin receptor protein 1; Cellular uptake of iron occurs via receptor-mediated endocytosis of ligand-occupied transferrin receptor into specialized endosomes. Endosomal acidification leads to iron release. The apotransferrin-receptor complex is then recycled to the cell surface with a return to neutral pH and the concomitant loss of affinity of apotransferrin for its receptor. Transferrin r…
kmeans	4	Cyan	62	TLR8	9606.ENSP00000312082	Toll-like receptor 8; Key component of innate and adaptive immunity. TLRs (Toll-like receptors) control host immune response against pathogens through recognition of molecular patterns specific to microorganisms. Acts via MYD88 and TRAF6, leading to NF-kappa-B activation, cytokine secretion and the inflammatory response; CD molecules
kmeans	4	Cyan	62	TNFRSF4	9606.ENSP00000368538	Tumor necrosis factor receptor superfamily member 4; Receptor for TNFSF4/OX40L/GP34. Is a costimulatory molecule implicated in long-term T-cell immunity; CD molecules
kmeans	4	Cyan	62	TNFRSF9	9606.ENSP00000478699	Tumor necrosis factor receptor superfamily member 9; Receptor for TNFSF9/4-1BBL. Possibly active during T cell activation; CD molecules
kmeans	5	Blue	24	ABCF1	9606.ENSP00000313603	ATP-binding cassette sub-family F member 1; Isoform 2 is required for efficient Cap- and IRES- mediated mRNA translation initiation. Isoform 2 is not involved in the ribosome biogenesis; ATP binding cassette subfamily F
kmeans	5	Blue	24	AIF1	9606.ENSP00000365227	Allograft inflammatory factor 1; Actin-binding protein that enhances membrane ruffling and RAC activation. Enhances the actin-bundling activity of LCP1. Binds calcium. Plays a role in RAC signaling and in phagocytosis. May play a role in macrophage activation and function. Promotes the proliferation of vascular smooth muscle cells and of T- lymphocytes. Enhances lymphocyte migration. Plays a role…
kmeans	5	Blue	24	CA4	9606.ENSP00000300900	Carbonic anhydrase 4; Reversible hydration of carbon dioxide. May stimulate the sodium/bicarbonate transporter activity of SLC4A4 that acts in pH homeostasis. It is essential for acid overload removal from the retina and retina epithelium, and acid release in the choriocapillaris in the choroid; Belongs to the alpha-carbonic anhydrase family
kmeans	5	Blue	24	CD226	9606.ENSP00000280200	CD226 antigen; Involved in intercellular adhesion, lymphocyte signaling, cytotoxicity and lymphokine secretion mediated by cytotoxic T-lymphocyte (CTL) and NK cell. Cell surface receptor for NECTIN2. Upon ligand binding, stimulates T- cell proliferation and cytokine production, including that of IL2, IL5, IL10, IL13, and IFNG. Competes with PVRIG for NECTIN2-binding; CD molecules
kmeans	5	Blue	24	CD244	9606.ENSP00000357012	Natural killer cell receptor 2B4; Heterophilic receptor of the signaling lymphocytic activation molecule (SLAM) family; its ligand is CD48. SLAM receptors triggered by homo- or heterotypic cell-cell interactions are modulating the activation and differentiation of a wide variety of immune cells and thus are involved in the regulation and interconnection of both innate and adaptive immune response…
kmeans	5	Blue	24	CD53	9606.ENSP00000271324	Leukocyte surface antigen CD53; Required for efficient formation of myofibers in regenerating muscle at the level of cell fusion. May be involved in growth regulation in hematopoietic cells (By similarity); CD molecules
kmeans	5	Blue	24	CD6	9606.ENSP00000323280	T-cell differentiation antigen CD6; Cell adhesion molecule that mediates cell-cell contacts and regulates T-cell responses via its interaction with ALCAM/CD166. Contributes to signaling cascades triggered by activation of the TCR/CD3 complex. Functions as costimulatory molecule; promotes T-cell activation and proliferation. Contributes to the formation and maturation of the immunological synapse.…
kmeans	5	Blue	24	CD74	9606.ENSP00000009530	HLA class II histocompatibility antigen gamma chain; Plays a critical role in MHC class II antigen processing by stabilizing peptide-free class II alpha/beta heterodimers in a complex soon after their synthesis and directing transport of the complex from the endoplasmic reticulum to the endosomal/lysosomal system where the antigen processing and binding of antigenic peptides to MHC class II takes…
kmeans	5	Blue	24	CRTAM	9606.ENSP00000227348	Cytotoxic and regulatory T-cell molecule; Interaction with CADM1 promotes natural killer (NK) cell cytotoxicity and interferon-gamma (IFN-gamma) secretion by CD8+ cells in vitro as well as NK cell-mediated rejection of tumors expressing CADM3 in vivo; Belongs to the nectin family
kmeans	5	Blue	24	CTSS	9606.ENSP00000357981	Cathepsin S; Thiol protease. Key protease responsible for the removal of the invariant chain from MHC class II molecules. The bond- specificity of this proteinase is in part similar to the specificities of cathepsin L and cathepsin N; Cathepsins
kmeans	5	Blue	24	GZMH	9606.ENSP00000216338	Granzyme h (cathepsin g-like 2); Granzyme H; Cytotoxic chymotrypsin-like serine protease with preference for bulky and aromatic residues at the P1 position and acidic residues at the P3' and P4' sites. Probably necessary for target cell lysis in cell-mediated immune responses. Participates in the antiviral response via direct cleavage of several proteins essential for viral replication
kmeans	5	Blue	24	GZMK	9606.ENSP00000231009	Granzyme K; Belongs to the peptidase S1 family. Granzyme subfamily
kmeans	5	Blue	24	HLA-DOA	9606.ENSP00000229829	HLA class II histocompatibility antigen, DO alpha chain; Important modulator in the HLA class II restricted antigen presentation pathway by interaction with the HLA-DM molecule in B-cells. Modifies peptide exchange activity of HLA-DM; C1-set domain containing
kmeans	5	Blue	24	HLA-DPA1	9606.ENSP00000393566	Major histocompatibility complex, class ii, dp alpha 1; HLA class II histocompatibility antigen, DP alpha 1 chain; Binds peptides derived from antigens that access the endocytic route of antigen presenting cells (APC) and presents them on the cell surface for recognition by the CD4 T-cells. The peptide binding cleft accommodates peptides of 10-30 residues. The peptides presented by MHC class II m…
kmeans	5	Blue	24	HLA-DPB1	9606.ENSP00000408146	HLA class II histocompatibility antigen, DP beta 1 chain; Binds peptides derived from antigens that access the endocytic route of antigen presenting cells (APC) and presents them on the cell surface for recognition by the CD4 T-cells. The peptide binding cleft accommodates peptides of 10-30 residues. The peptides presented by MHC class II molecules are generated mostly by degradation of proteins …
kmeans	5	Blue	24	HLA-DQA1	9606.ENSP00000339398	Major histocompatibility complex, class II, DQ alpha 1; Belongs to the MHC class II family
kmeans	5	Blue	24	IGSF6	9606.ENSP00000268389	Immunoglobulin superfamily member 6; V-set domain containing
kmeans	5	Blue	24	KLRF1	9606.ENSP00000483713	Killer cell lectin-like receptor subfamily F member 1; Involved in the natural killer (NK)-mediated cytolysis of PHA-induced lymphoblasts; C-type lectin domain containing
kmeans	5	Blue	24	LAPTM5	9606.ENSP00000294507	Lysosomal-associated transmembrane protein 5; May have a special functional role during embryogenesis and in adult hematopoietic cells; Belongs to the LAPTM4/LAPTM5 transporter family
kmeans	5	Blue	24	M6PR	9606.ENSP00000000412	Cation-dependent mannose-6-phosphate receptor; Transport of phosphorylated lysosomal enzymes from the Golgi complex and the cell surface to lysosomes. Lysosomal enzymes bearing phosphomannosyl residues bind specifically to mannose-6- phosphate receptors in the Golgi apparatus and the resulting receptor-ligand complex is transported to an acidic prelyosomal compartment where the low pH mediates th…
kmeans	5	Blue	24	NKG7	9606.ENSP00000221978	Protein NKG7; Natural killer cell granule protein 7; Belongs to the PMP-22/EMP/MP20 family
kmeans	5	Blue	24	SH2D1A	9606.ENSP00000360181	SH2 domain-containing protein 1A; Cytoplasmic adapter regulating receptors of the signaling lymphocytic activation molecule (SLAM) family such as SLAMF1, CD244, LY9, CD84, SLAMF6 and SLAMF7. In SLAM signaling seems to cooperate with SH2D1B/EAT-2. Initially it has been proposed that association with SLAMF1 prevents SLAMF1 binding to inhibitory effectors including INPP5D/SHIP1 and PTPN11/SHP-2. How…
kmeans	5	Blue	24	TNFAIP8	9606.ENSP00000427424	Tumor necrosis factor alpha-induced protein 8; Acts as a negative mediator of apoptosis and may play a role in tumor progression. Suppresses the TNF-mediated apoptosis by inhibiting caspase-8 activity but not the processing of procaspase-8, subsequently resulting in inhibition of BID cleavage and caspase-3 activation
kmeans	5	Blue	24	TYROBP	9606.ENSP00000262629	Transmembrane immune signaling adaptor tyrobp; TYRO protein tyrosine kinase-binding protein; Non-covalently associates with activating receptors of the CD300 family. Cross-linking of CD300-TYROBP complexes results in cellular activation. Involved for instance in neutrophil activation mediated by integrin
